# Supplementary material
Source: bioRxiv or medRxiv preprint supplement (https://medrxiv.org/highwire/filestream/73035/field_highwire_adjunct_files/0/2020.03.04.20029538-1.pdf)
Supplement: Supplementary file [file 2020.03.04.20029538-1.pdf]

1 **Supplementary Information**

2 **Nanopore target sequencing for accurate and comprehensive detection of SARS-CoV-2 and**  
3 **other respiratory viruses**

4 Ming Wang<sup>#1</sup>, Aisi Fu<sup>#2</sup>, Ben Hu<sup>#2</sup>, Yongqing Tong<sup>#1</sup>, Ran Liu<sup>#2</sup>, Jiashuang Gu<sup>3</sup>, Jianghao Liu<sup>3</sup>,  
5 Wen Jiang<sup>3</sup>, Gaigai Shen<sup>2</sup>, Wanxu Zhao<sup>2</sup>, Dong Men<sup>4</sup>, Zixin Deng<sup>1,5,6</sup>, Lilei Yu<sup>7</sup>, Yan Li<sup>\*1</sup>,  
6 Tiangang Liu<sup>\*2,6</sup>

7  
8 <sup>1</sup> Department of Clinical Laboratory, Renmin Hospital of Wuhan University, Wuhan, 430060,  
9 China

10 <sup>2</sup> Key Laboratory of Combinatorial Biosynthesis and Drug Discovery, Ministry of Education and  
11 Wuhan University School of Pharmaceutical Sciences, Wuhan, 430071, China

12 <sup>3</sup> Wuhan Dgensee Clinical Laboratory Co., Ltd., Wuhan, 430075, China

13 <sup>4</sup> Wuhan Institute of Virology, Chinese Academy of Sciences, Wuhan, Hubei Province, P.R. China

14 <sup>5</sup>State Key Laboratory of Microbial Metabolism, Joint International Research Laboratory of  
15 Metabolic & Developmental Sciences, and School of Life Sciences and Biotechnology, Shanghai  
16 Jiao Tong University, Shanghai, 200030, China

17 <sup>6</sup>Hubei Engineering Laboratory for Synthetic Microbiology, Wuhan Institute of Biotechnology,  
18 Wuhan, 430075, China

19 <sup>7</sup>Department of Internal Medicine, Renmin Hospital of Wuhan University, Wuhan, 430060, China

20 # These authors contributed equally to this work.

21 ***Corresponding author:***

22 Tiangang Liu, ([liutg@whu.edu.cn](mailto:liutg@whu.edu.cn)) ; Yan Li, ([yanlitf1120@163.com](mailto:yanlitf1120@163.com))

23

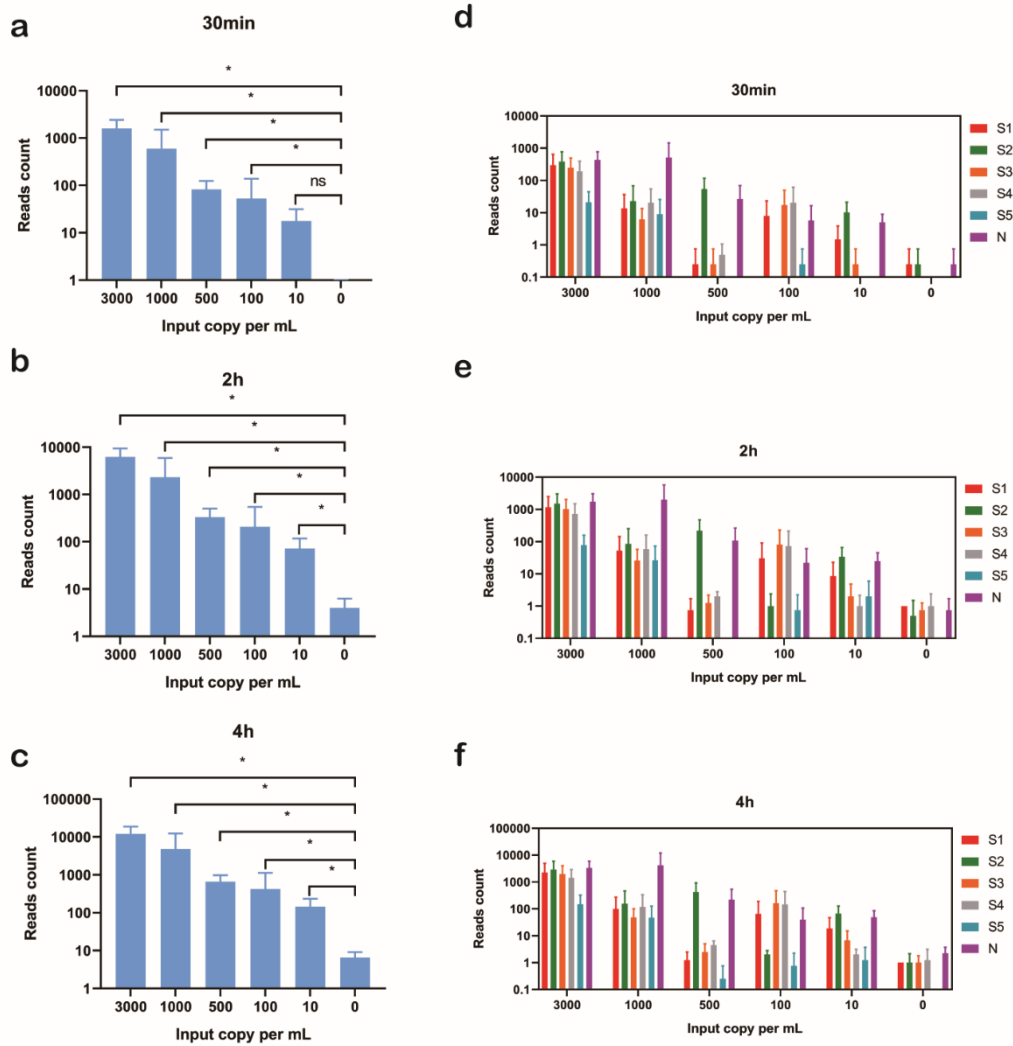

24

25 **Supplementary Fig. 1| Performance verification test of NTS for detecting SARS-CoV-2 using**  
 26 **standard synthetic S and N genes.** Comparison of all SARS-CoV-2 reads detected by NTS in  
 27 replicates with different concentrations and negative controls using 30 min (**a**), 2 h (**b**), or 4 h  
 28 (c)sequencing data. Read counts mapped to each target region of the SARS-CoV-2 genome in  
 29 replicates with different concentrations with 30 min (**d**), 2 h (**e**), or 4 h (**f**) sequencing data. Two-  
 30 tailed Student t-test (for normal distribution samples) or Mann–Whitney U-test (for non-normal  
 31 distribution samples): ns, not significant, \* $P < 0.05$ ; bars represent the means  $\pm$  SD.

**a**

| Patient ID | NTS target sites |     |     |     |     |    |     |     |     |     |     | Final result of NTS and qPCR |           |     |      |
|------------|------------------|-----|-----|-----|-----|----|-----|-----|-----|-----|-----|------------------------------|-----------|-----|------|
|            | RdRP             | S1  | S2  | S3  | S4  | S5 | S3a | 3aM | M7a | 7aN | N   | N10                          | NTS Score | NTS | qPCR |
| A2         | 10               | 5   | 11  | 6   | 10  | 1  | 1   | 3   | 5   | 5   | 19  | 0                            | 5         | Pos | Pos  |
| A4         | 65               | 66  | 80  | 70  | 62  | 6  | 14  | 17  | 29  | 91  | 174 | 1                            | 9.8       | Pos | Pos  |
| C1         | 237              | 168 | 199 | 157 | 184 | 17 | 54  | 50  | 203 | 212 | 267 | 23                           | 11.4      | Pos | Pos  |
| C2         | 141              | 142 | 267 | 134 | 200 | 4  | 73  | 21  | 83  | 224 | 219 | 34                           | 10.8      | Pos | Pos  |
| D12        | 375              | 262 | 373 | 226 | 352 | 42 | 165 | 75  | 187 | 428 | 257 | 12                           | 11.4      | Pos | Pos  |
| E5         | 15               | 22  | 32  | 14  | 17  | 0  | 9   | 2   | 10  | 35  | 43  | 0                            | 7.4       | Pos | Pos  |
| G1         | 156              | 60  | 134 | 116 | 97  | 9  | 42  | 27  | 99  | 184 | 226 | 4                            | 10.2      | Pos | Pos  |
| H9         | 164              | 212 | 279 | 170 | 252 | 14 | 73  | 53  | 179 | 200 | 315 | 1                            | 10.4      | Pos | Pos  |
| E1         | 44               | 31  | 18  | 16  | 17  | 3  | 2   | 4   | 30  | 29  | 33  | 0                            | 7.8       | Pos | Pos  |
| A6         | 0                | 2   | 1   | 0   | 0   | 1  | 1   | 0   | 0   | 0   | 0   | 0                            | 0         | Neg | Inc  |
| A9         | 1                | 0   | 3   | 0   | 0   | 0  | 0   | 1   | 2   | 8   | 5   | 0                            | 0.8       | Neg | Inc  |
| A12        | 0                | 0   | 0   | 0   | 1   | 0  | 0   | 0   | 1   | 0   | 12  | 0                            | 0         | Neg | Inc  |
| B4         | 0                | 0   | 0   | 0   | 0   | 0  | 0   | 0   | 0   | 1   | 1   | 0                            | 0         | Neg | Inc  |
| C11        | 0                | 0   | 0   | 0   | 2   | 0  | 0   | 0   | 0   | 0   | 4   | 0                            | 0         | Neg | Inc  |
| D2         | 0                | 0   | 0   | 0   | 0   | 0  | 0   | 0   | 0   | 0   | 1   | 0                            | 0         | Neg | Inc  |
| F5         | 17               | 21  | 0   | 10  | 0   | 0  | 0   | 0   | 0   | 0   | 1   | 0                            | 3         | Pos | Inc  |
| F12        | 1                | 0   | 0   | 0   | 0   | 0  | 0   | 0   | 0   | 0   | 0   | 0                            | 0         | Neg | Inc  |
| H12        | 0                | 3   | 2   | 0   | 0   | 0  | 0   | 0   | 0   | 0   | 1   | 0                            | 0.4       | Neg | Inc  |
| D10        | 0                | 0   | 0   | 1   | 0   | 0  | 0   | 0   | 0   | 0   | 0   | 0                            | 0         | Neg | Inc  |
| A1         | 1                | 0   | 1   | 0   | 0   | 0  | 1   | 1   | 0   | 1   | 0   | 0                            | 0         | Neg | Neg  |
| A3         | 1                | 1   | 0   | 0   | 0   | 0  | 0   | 0   | 0   | 0   | 0   | 0                            | 0         | Neg | Neg  |
| A5         | 0                | 0   | 0   | 0   | 0   | 0  | 0   | 0   | 0   | 0   | 3   | 0                            | 0         | Neg | Neg  |
| A7         | 0                | 0   | 0   | 0   | 0   | 0  | 0   | 0   | 0   | 4   | 70  | 3                            | 0.8       | Neg | Neg  |
| A8         | 0                | 0   | 0   | 0   | 0   | 0  | 0   | 0   | 0   | 0   | 1   | 0                            | 0         | Neg | Neg  |
| PC         | 0                | 58  | 44  | 40  | 49  | 28 | 4   | 0   | 0   | 0   | 0   | 0                            | 5.4       | Pos | Pos  |
| NC         | 0                | 0   | 0   | 0   | 0   | 0  | 0   | 0   | 0   | 0   | 34  | 0                            | NA        | Neg | Neg  |
| A11        | 8                | 0   | 0   | 4   | 1   | 0  | 0   | 0   | 0   | 48  | 18  | 0                            | 2.8       | Pos | Pos  |
| B9         | 106              | 9   | 40  | 65  | 18  | 1  | 41  | 4   | 9   | 65  | 75  | 4                            | 8.6       | Pos | Pos  |
| C9         | 81               | 8   | 37  | 7   | 37  | 0  | 0   | 2   | 11  | 92  | 4   | 0                            | 6.2       | Pos | Pos  |
| D9         | 65               | 18  | 111 | 50  | 53  | 6  | 55  | 5   | 5   | 156 | 127 | 0                            | 9.2       | Pos | Pos  |
| D11        | 23               | 18  | 38  | 3   | 32  | 0  | 25  | 0   | 11  | 33  | 61  | 0                            | 8.4       | Pos | Pos  |
| E3         | 1                | 0   | 4   | 3   | 7   | 0  | 0   | 0   | 0   | 0   | 5   | 0                            | 1.6       | Inc | Pos  |
| E11        | 16               | 10  | 44  | 23  | 16  | 0  | 38  | 5   | 5   | 51  | 70  | 6                            | 9.2       | Pos | Pos  |
| F11        | 114              | 37  | 82  | 78  | 23  | 4  | 96  | 9   | 16  | 116 | 132 | 0                            | 9.8       | Pos | Pos  |
| G11        | 205              | 124 | 181 | 117 | 140 | 3  | 142 | 33  | 40  | 215 | 181 | 1                            | 10.4      | Pos | Pos  |
| G12        | 255              | 70  | 302 | 86  | 90  | 0  | 218 | 3   | 96  | 375 | 65  | 0                            | 9.4       | Pos | Pos  |
| C12        | 3                | 6   | 10  | 0   | 0   | 0  | 5   | 1   | 3   | 4   | 2   | 0                            | 3         | Pos | Inc  |
| E6         | 6                | 11  | 21  | 0   | 0   | 0  | 0   | 1   | 0   | 0   | 0   | 0                            | 2.4       | Inc | Inc  |
| E12        | 0                | 0   | 0   | 1   | 0   | 0  | 0   | 0   | 0   | 0   | 0   | 0                            | 0         | Neg | Inc  |
| F8         | 0                | 8   | 0   | 0   | 18  | 0  | 0   | 0   | 0   | 6   | 0   | 0                            | 1.8       | Inc | Inc  |
| G6         | 0                | 0   | 14  | 0   | 0   | 0  | 1   | 0   | 0   | 0   | 0   | 0                            | 1         | Neg | Inc  |
| H3         | 0                | 0   | 1   | 4   | 0   | 0  | 0   | 0   | 0   | 0   | 0   | 0                            | 0.4       | Neg | Inc  |
| A10        | 0                | 0   | 0   | 0   | 0   | 0  | 0   | 0   | 0   | 0   | 2   | 0                            | 0         | Neg | Neg  |
| B1         | 1                | 0   | 0   | 0   | 0   | 1  | 0   | 0   | 0   | 1   | 2   | 0                            | 0         | Neg | Neg  |
| B2         | 0                | 1   | 0   | 0   | 1   | 0  | 0   | 0   | 0   | 3   | 0   | 0                            | 0.4       | Neg | Neg  |
| B3         | 1                | 6   | 1   | 0   | 4   | 1  | 0   | 0   | 0   | 11  | 19  | 0                            | 2.8       | Pos | Neg  |
| B5         | 0                | 0   | 0   | 0   | 0   | 0  | 0   | 0   | 0   | 0   | 0   | 0                            | 0         | Neg | Neg  |
| PC         | 0                | 48  | 57  | 39  | 52  | 28 | 1   | 0   | 0   | 0   | 0   | 0                            | 5         | Pos | Pos  |
| NC         | 0                | 0   | 0   | 0   | 0   | 0  | 0   | 0   | 0   | 0   | 0   | 0                            | NA        | Neg | Neg  |

**b**

| Patient ID | NTS target sites |    |     |    |     |    |     |     |     |     |     | Final result of NTS and qPCR |           |     |      |
|------------|------------------|----|-----|----|-----|----|-----|-----|-----|-----|-----|------------------------------|-----------|-----|------|
|            | RdRP             | S1 | S2  | S3 | S4  | S5 | S3a | 3aM | M7a | 7aN | N   | N10                          | NTS Score | NTS | qPCR |
| R01        | 0                | 0  | 1   | 0  | 0   | 0  | 1   | 0   | 0   | 0   | 0   | 0                            | 0         | Neg | Pos  |
| R02        | 0                | 0  | 1   | 0  | 1   | 0  | 0   | 0   | 0   | 1   | 0   | 0                            | 0         | Neg | Neg  |
| R03        | 2                | 0  | 2   | 0  | 0   | 0  | 0   | 0   | 0   | 0   | 2   | 0                            | 0         | Neg | Pos  |
| R04        | 0                | 0  | 0   | 0  | 0   | 0  | 0   | 0   | 0   | 0   | 0   | 0                            | 0         | Neg | Neg  |
| R05        | 3                | 0  | 4   | 2  | 0   | 0  | 15  | 0   | 5   | 29  | 19  | 0                            | 4.2       | Pos | Pos  |
| R06        | 6                | 0  | 3   | 1  | 0   | 0  | 3   | 0   | 0   | 1   | 9   | 0                            | 1.6       | Inc | Inc  |
| R07        | 0                | 0  | 0   | 0  | 2   | 1  | 0   | 0   | 0   | 1   | 0   | 0                            | 0         | Neg | Inc  |
| R08        | 1                | 0  | 0   | 0  | 0   | 0  | 0   | 0   | 0   | 0   | 0   | 0                            | 0         | Neg | Inc  |
| R09        | 0                | 1  | 0   | 0  | 0   | 0  | 1   | 0   | 0   | 0   | 0   | 1                            | 0         | Neg | Neg  |
| R10        | 1                | 0  | 5   | 0  | 1   | 0  | 0   | 0   | 0   | 0   | 1   | 0                            | 0.4       | Neg | Neg  |
| R11        | 335              | 26 | 492 | 62 | 155 | 0  | 317 | 7   | 14  | 286 | 300 | 4                            | 9.8       | Pos | Pos  |
| R12        | 34               | 7  | 47  | 2  | 2   | 0  | 16  | 0   | 0   | 44  | 19  | 0                            | 5.4       | Pos | Pos  |
| R13        | 3                | 0  | 0   | 0  | 0   | 0  | 13  | 0   | 0   | 2   | 0   | 0                            | 1.4       | Inc | Pos  |
| R14        | 0                | 0  | 1   | 0  | 0   | 0  | 0   | 0   | 0   | 0   | 1   | 0                            | 0         | Neg | Pos  |
| R15        | 0                | 1  | 9   | 0  | 3   | 0  | 6   | 0   | 0   | 6   | 3   | 0                            | 2         | Inc | Pos  |
| R16        | 1                | 0  | 1   | 0  | 0   | 0  | 0   | 0   | 0   | 0   | 0   | 0                            | 0         | Neg | Pos  |
| NC         | 0                | 0  | 0   | 0  | 0   | 0  | 0   | 0   | 0   | 0   | 0   | 0                            | NA        | Neg | Neg  |
| NC         | 0                | 0  | 0   | 0  | 0   | 0  | 0   | 0   | 0   | 0   | 0   | 0                            | NA        | Neg | Neg  |

Positive Inconclusive Negative

33 **Supplementary Fig 2. Comparison of 61 nucleic acid sequences from clinical samples obtained**  
34 **using NTS (10 min) and qPCR. a,** Comparison of 45 nucleic acid sequences from samples of  
35 patients with suspected COVID-19 obtained using NTS and qPCR (kit 2). **b,** Comparison of 24  
36 nucleic acid sequences from patients with confirmed disease obtained using NTS and qPCR (kit1).  
37 The numbers in the table on the left represent the number of mapped reads according to our rules.  
38 PC: positive control. The plasmid harboring an *S* gene was used as a positive control in NTS  
39 testing; a positive sample in the kit served as a positive control in qPCR testing. NC: negative  
40 control. Tris-EDTA buffer was used as a negative control in NTS testing; H<sub>2</sub>O in the kit served as a  
41 positive control in qPCR testing. Pos: positive. Inc: inconclusive. Neg: Negative.  
42

43 **Supplementary Table 1. Primers for amplification of specific fragments of SARS-Cov-2 in**44 **NTS**

| Primer    | Primer sequence            |
|-----------|----------------------------|
| S1-F      | TTGTTTTTCTTGTTTTATTGCCACT  |
| S1-R      | ACCAATGGTTCTAAAGCCGA       |
| S2-F      | TCACTAGGTTTCAAACCTTACTTGC  |
| S2-R      | TTACAAGGTGTGCTACCGGC       |
| S3-F      | TGGTGTTGAAGGTTTTAATTGTTAC  |
| S3-R      | ACTAGCTACACTACGTGCCC       |
| S4-F      | CAATCCATCATTGCCTACACTAT    |
| S4-R      | AAGCGTGTTTAAAGCTTGTGC      |
| S5-F      | GTAAACAACCTTAGCTCCAATTTTG  |
| S5-R      | CAGCCCTTGAGACAACACTACAG    |
| S3a-F     | GTTCTTGTGGATCCTGCTGCAAAT   |
| S3a-R     | TTAACAACCTCCGGATGAACCGT    |
| 3aM-F     | TCCAGTAATGGAACCAATTTATGA   |
| 3aM-R     | TGAATGACCACATGGAACGC       |
| M7a-F     | ATCCAGAACTAACATTCTTCTC     |
| M7a-R     | GATAGACGTGTTTTACGCCG       |
| 7aN-F     | AGTTACGTGCCAGATCAGT        |
| 7aN-R     | ATGTTGAGTGAGAGCGGTGA       |
| N-F       | GGCAAGGAAGACCTTAAATTCC     |
| N-R       | CCCGAAGGTGTGACTTCCAT       |
| N10-F     | AACGTGGTTGACCTACACAG       |
| N10-R     | TCCAACCTCAAGAACAACAGGATT   |
| Orf1ab-F1 | TATGCCATTAGTGCWAAGAATAGAG  |
| Orf1ab-R1 | CARATGTTAAASACACTATTAGCATA |
| Orf1ab-F2 | ACTATGACCAATAGACAGTTYCATC  |
| Orf1ab-R2 | ATTGGCCGTGACAGCTTG         |

46 **Supplementary Table 2. NTS score and positive detection rate of 10 copies standard plasmids**  
 47 **at different time**

| <b>Time</b> | <b>NTS score</b> |     |     |     | <b>Positive number</b> | <b>Inconclusive number</b> | <b>Negative number</b> |
|-------------|------------------|-----|-----|-----|------------------------|----------------------------|------------------------|
|             | 1                | 2   | 3   | 4   |                        |                            |                        |
| 10 min      | 0                | 0.4 | 0   | 0.4 | 0                      | 0                          | 4                      |
| 30 min      | 1                | 1.8 | 0   | 0.4 | 1                      | 1                          | 2                      |
| 1 h         | 1.4              | 2.4 | 0.4 | 2   | 3                      | 0                          | 1                      |
| 2 h         | 1.4              | 3.8 | 0.4 | 2.4 | 3                      | 0                          | 1                      |
| 4 h         | 3                | 3   | 1.2 | 3   | 3                      | 1                          | 0                      |

**Supplementary Table 3. Target of amplification of common respiratory viruses in NTS**

| Virus                       | Target gene      | Accession number (Region) <sup>a</sup> |
|-----------------------------|------------------|----------------------------------------|
| Bocavirus                   | <i>NP1</i>       | MK034749.1 (2351-2704)                 |
| Bocavirus                   | <i>VP1-2</i>     | MK034749.1 (4370-5189)                 |
| Rhinovirus                  | Polyprotein gene | MK032898.1 (145-541)                   |
| Human metapneumovirus       | <i>N</i> gene    | MN745087.1 (82-521)                    |
| Human metapneumovirus       | <i>F</i> gene    | MN745087.1 (3678-4425)                 |
| Respiratory syncytial virus | <i>G-F</i> gene  | KF246618.1 (1237-1768)                 |
| Respiratory syncytial virus | <i>G-F</i> gene  | MH760613.1 (5776-6357)                 |
| Respiratory syncytial virus | <i>N-P</i> gene  | MK733768.1 (1673-2510)                 |
| Coronavirus                 | <i>orf1ab</i>    | HM211099.1 (14699-15761)               |
| Coronavirus                 | <i>orf1ab</i>    | MN310478.1 (14883-15565)               |
| Adenovirus                  | hexon            | MH910668.1 (20146-21023)               |
| Adenovirus                  | hexon            | MH910668.1 (21029-21146)               |
| Parainfluenza virus         | <i>H</i> gene    | AB641312.1 (355-830)                   |
| Parainfluenza virus         | <i>H</i> gene    | MK167042.1 (4269-5205)                 |
| Parainfluenza virus         | <i>H</i> gene    | MH678693.1 (7468-7945)                 |
| Influenza A virus           | <i>M</i> gene    | MT031658.1 (12-581)                    |
| Influenza B virus           | <i>M</i> gene    | MT056023.1 (1-414)                     |
| Influenza B virus           | <i>HA</i> gene   | MT057835.1 (20-494)                    |
| Influenza B virus           | <i>NA</i> gene   | MT057837.1 (713-1464)                  |
| Influenza C virus           | <i>M</i> gene    | MK480600.1 (1- 1052)                   |

49 <sup>a</sup> Select a sequence in GenBank as the representative of the amplification area selected in NTS.

50 Accession number represent the number in GenBank, the position marked in parentheses refers to  
 51 the position of the sequence in the accession number. This region is the target region for  
 52 amplification.

54 **Supplementary Table 4. Detail of respiratory viruses primers panel**

| Virus                       | primer  | Sequence                     |
|-----------------------------|---------|------------------------------|
| Bocavirus                   | BCV-F1  | GASCTCTGTAAGTACTATTRC        |
|                             | BCV-R1  | CTCTGTGTTKRCTGAATACAG        |
|                             | BCV-F2  | GGACCACAGTCATCAGAC           |
|                             | BCV-R2  | CCACTACCATCGGGCTG            |
| Rhinovirus                  | HRV-F1  | CAAGCACTTCTGTYWCCCC          |
|                             | HRV-R1  | ACGGACACCCAAAGTAG            |
|                             | HRV-F2  | CAAGCACTTCTGTTTCCC           |
|                             | HRV-R2  | GAAACACCCAAAGTAG             |
| Human metapneumovirus       | HMPV-1  | AAGCATGCTATATTAAGAGTCTCA     |
|                             | HMPV-2  | ATTATGGGTGTGTCTGGTGCTGA      |
|                             | HMPV-3  | CAATGCAGGTATAACACCAGCAATATC  |
|                             | HMPV-4  | GCAACAATTGAACTGATCTTCAGGAAAC |
|                             | HMPV-5  | CCTTTTATAACATGCTGTTACC       |
| Respiratory syncytial virus | RSV-F1  | ATGATTWYCAYTTTGAAGTGTC       |
|                             | RSV-F2  | GGTTGGTATAACCAGTGTACATAAC    |
|                             | RSV-R1  | TGTTCTTTTGTGGAAYTCTATCACAG   |
|                             | RSV-R2  | AGTTACACCTGCATTAACACTAAATTC  |
|                             | RSV-F3  | GTCTTACAGCCGTGATTAGG         |
|                             | RSV-R3  | GGGCTTTCTTTGGTACTTC          |
| Coronavirus                 | HCoV-R1 | TTRTARCANACAACNSCATCATCA     |
|                             | HCoV-R2 | GCATWGTRTGYTGNGARCARAATTC    |
|                             | HCoV-F1 | ACWCARHTVAAYYTNAARTAYGC      |
|                             | HCoV-F2 | GGWTGGGAYTATCCYAARTGTGA      |
|                             | HCoV-F3 | GGWTGGGAYTATCCYAARTGTGAT     |
|                             | HCoV-R3 | CCCCATCATCASWVARAATCATCAT    |
|                             | HCoV-R4 | CCCCATCATCASWVARAATCATCATA   |
|                             | HCoV-F4 | ACTCARWTRAATYTNAATAAYGC      |
| Adenovirus                  | AdV-F1  | TTCCCCATGGCNCACAAYAC         |
|                             | AdV-F2  | GCCACCTTCTCCCCATGGC          |
|                             | AdV-F3  | AGACATGACHTTYGAGGTGGAYCC     |
|                             | AdV-R1  | GTGCGGCTGGTGCACACGGA         |
|                             | AdV-R2  | GTAGCGTTGCCGGCCGAGAA         |
|                             | AdV-R3  | GTAGCGTTGCCGGCCGAGAAG        |
| Parainfluenza virus         | HPIV-F1 | CYTAAATTCAGATATGTAT          |
|                             | HPIV-F2 | CYTAAATTCAGATATGTATCCTG      |
|                             | HPIV-R1 | GATAAATAATTATTGATAYG         |
|                             | HPIV-R2 | TCAGATAAATAATTATTGATA        |
|                             | HPIV-F3 | AACAATCTGCTGCRGVRTTT         |
|                             | HPIV-F4 | ATACAACAATCTGCTGCRGV         |
|                             | HPIV-R3 | ATGTCAGAYAATGGRCAAAT         |
|                             | HPIV-R4 | GTCAGAYAATGGRCAAATAAG        |



|                   |         |                          |
|-------------------|---------|--------------------------|
|                   | HPIV-F5 | CTGTAAACTCAGAYTTGGTA     |
|                   | HPIV-R5 | TTYAARCCYTTGTCAACAAC     |
|                   | HPIV-F6 | CCGGTARTTTCYCATACTATG    |
| Influenza A virus | IAV-R1  | CCAGCCATCTGYTCCATAGC     |
|                   | IAV-R2  | GTRGTGCTRGCCAGCACC       |
|                   | IAV-F1  | ARATGAGYCTTCTAACCGAGGTCG |
|                   | IAV-F2  | AGGGCATTGTTGGACAAAKCGTCT |
| Influenza B virus | IBV-F1  | ATGTCGCTGTTTGGAGACACAAT  |
|                   | IBV-R1  | TCAGCTAGAATCAGRCCYTTCTT  |
|                   | IBV-4   | CCAGGATTCAGGTACATGACC    |
|                   | IBV-F2  | ATGAAGGCAATAATTGTACTACTC |
|                   | IBV-R2  | GGCAAGAYCCTGAGGTTCC      |
|                   | IBV-F3  | CAAGAAAGTGCCTGCAATTGC    |
|                   | IBV-R3  | GAACAGAYTCAACCATTCTCC    |
| Influenza C virus | ICV-F1  | GTTGCTCCTGAGACCAGGACAG-  |
|                   | ICV-F2  | GACTACACACCAGACATCCG     |
|                   | ICV-R1  | GAGTTGTCGGTTTCGTCAG      |
|                   | ICV-F3  | ACAGCTTGGTTRAGATGCAA     |

55

56

57 **Supplementary Table 5. the result of NTS for detection of respiratory viruses in mixed clinical**  
58 **sample**

| Respiratory viruses         | Detected reads (10 mins) | Detected reads (2h) |
|-----------------------------|--------------------------|---------------------|
| influenza A virus           | 2                        | 80                  |
| influenza B virus           | 2                        | 34                  |
| parainfluenza               | ND                       | 8                   |
| respiratory syncytial virus | 354                      | 4378                |
| rhinovirus                  | 61                       | 702                 |

59 ND: not detected.

60

61

62
